# Supplementary material
Source: PubMed Central journal article supplement (PMC4580135)
Supplement: NIHMS691029-supplement-8.pdf [file NIHMS691029-supplement-8.pdf]

A

| Regulator | Type     | Fold  | Targets | p                   | Prediction | Z     |
|-----------|----------|-------|---------|---------------------|------------|-------|
| XBP1      | TF       | -1.84 | 24      | 1x10 <sup>-9</sup>  | Inhibited  | -3.17 |
| MKL2      | TF       |       | 15      | 2x10 <sup>-9</sup>  | Inhibited  | -3.16 |
| TGFB1     | GF       |       | 95      | 3x10 <sup>-13</sup> | Inhibited  | -2.73 |
| SRF       | TF       |       | 26      | 2x10 <sup>-7</sup>  | Inhibited  | -2.71 |
| CD38      | enzyme   |       | 18      | 2x10 <sup>-7</sup>  | Inhibited  | -2.35 |
| MKL1      | TF       | -1.55 | 16      | 7x10 <sup>-8</sup>  | Inhibited  | -2.33 |
| ITK       | kinase   | 1.80  | 13      | 1x10 <sup>-7</sup>  | Activated  | 2.02  |
| NCR1      | receptor | 2.87  | 6       | 7x10 <sup>-8</sup>  | Activated  | 2.22  |
| IL2       | cytokine |       | 48      | 1x10 <sup>-14</sup> | Activated  | 2.77  |

TF = transcription factor, GF = growth factor, Z=prediction Z-score

B

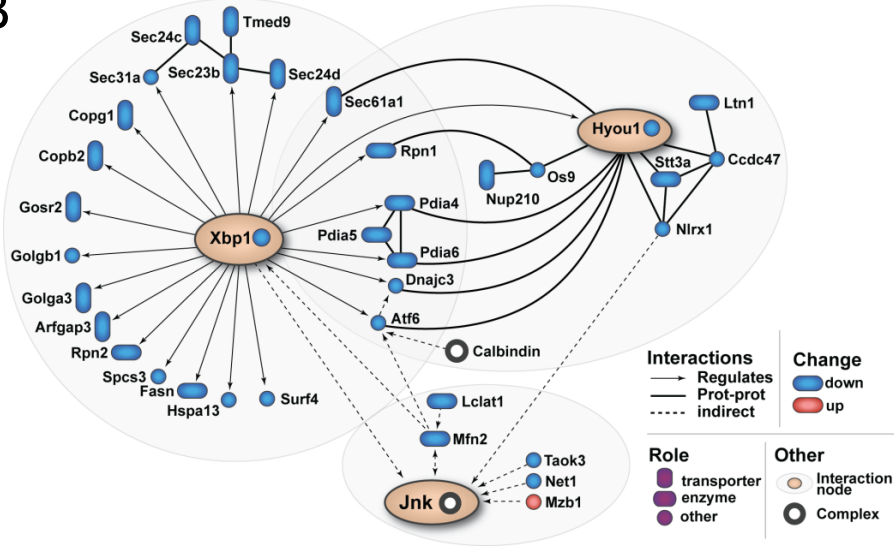

C

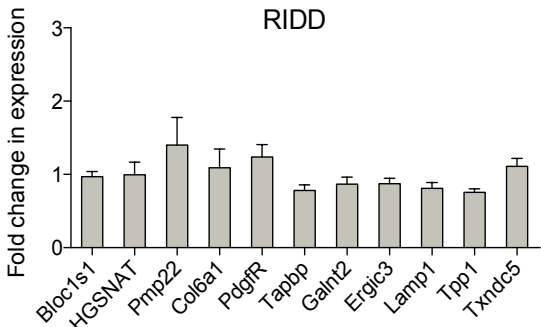

D

| Functional cluster                 | GO terms   | Description                             | Enr | P      | FDR | N  | %↓  |
|------------------------------------|------------|-----------------------------------------|-----|--------|-----|----|-----|
| Carbohydrate metabolic process     | GO:0044262 | cellular carbohydrate metabolic process | 2.2 | 0.0006 | 1%  | 24 | 96% |
|                                    | GO:0005975 | carbohydrate metabolic process          | 1.9 | 0.0013 | 2%  | 29 | 97% |
| Protein localization and transport | GO:0045184 | establishment of protein localization   | 1.7 | 0.0022 | 3%  | 37 | 78% |
|                                    | GO:0015031 | protein transport                       | 1.7 | 0.0034 | 5%  | 36 | 81% |
|                                    | GO:0008104 | protein localization                    | 1.6 | 0.0067 | 9%  | 39 | 77% |
| Regulation of cell communication   | GO:0010646 | regulation of cell communication        | 1.6 | 0.0034 | 5%  | 41 | 68% |
| Lipid metabolic process            | GO:0006629 | lipid metabolic process                 | 1.6 | 0.0094 | 13% | 36 | 67% |

Enr=enrichment fold, N=number of involved genes, % ↓ =% of involved genes that are down regulated
