# Supplementary material
Source: PubMed Central journal article supplement (PMC4580135)

**A**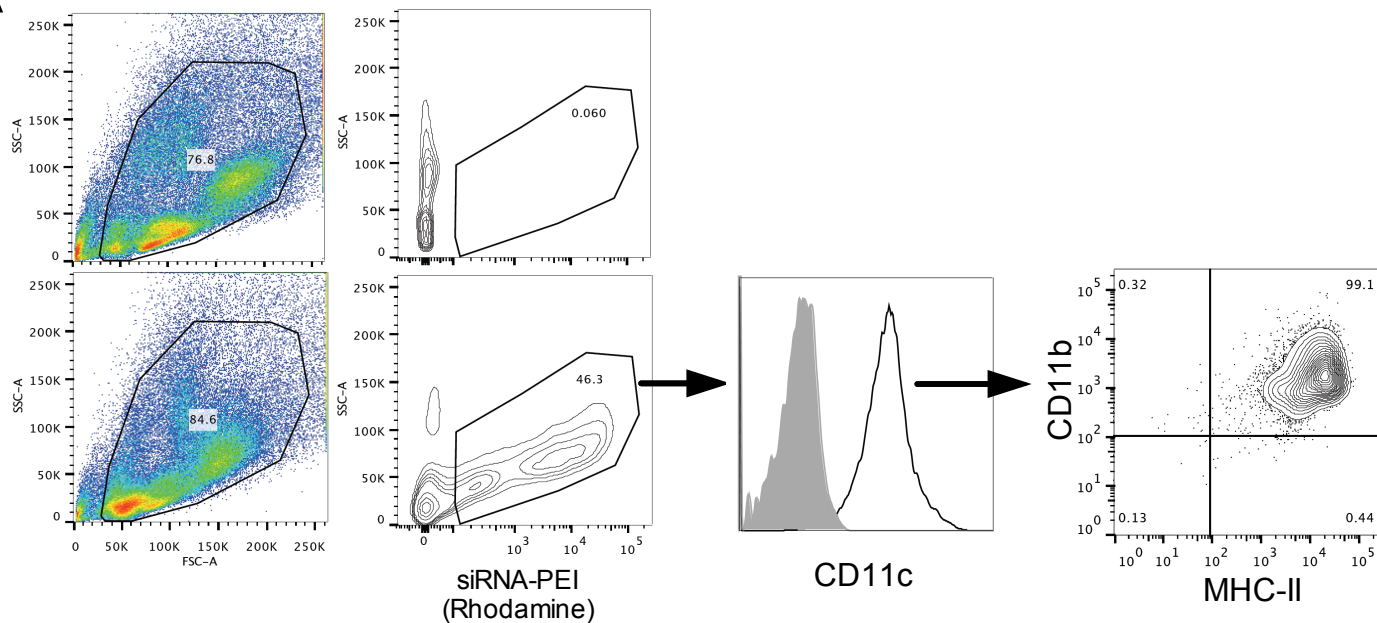**B**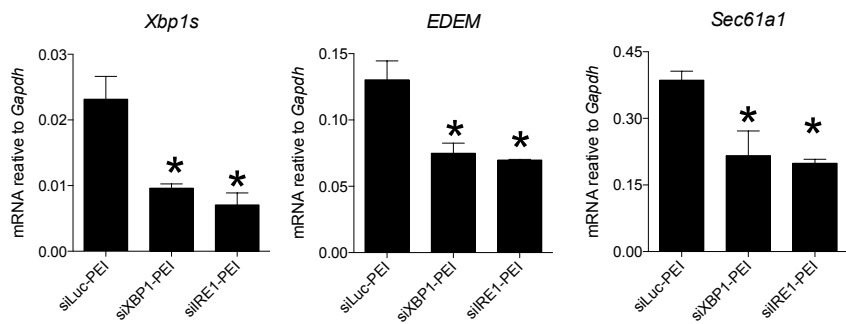**C**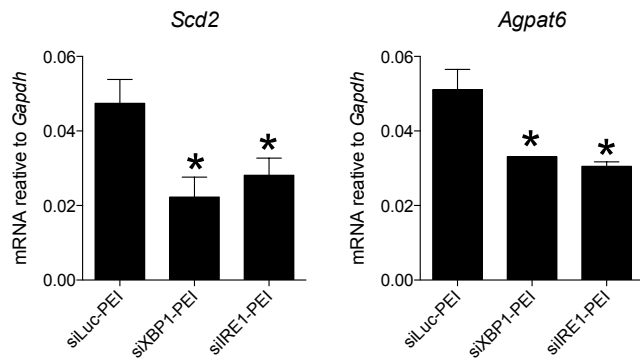**D**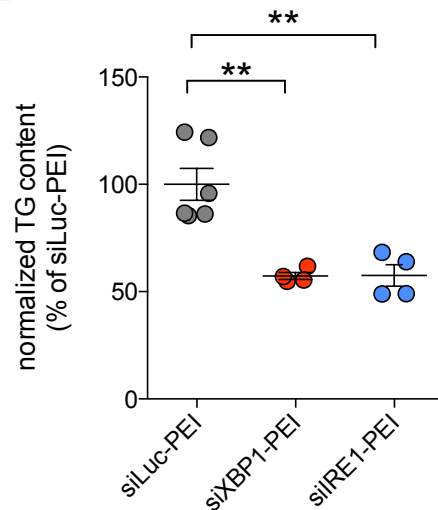

Supplement: NIHMS691029-supplement-11.pdf [file NIHMS691029-supplement-11.pdf]

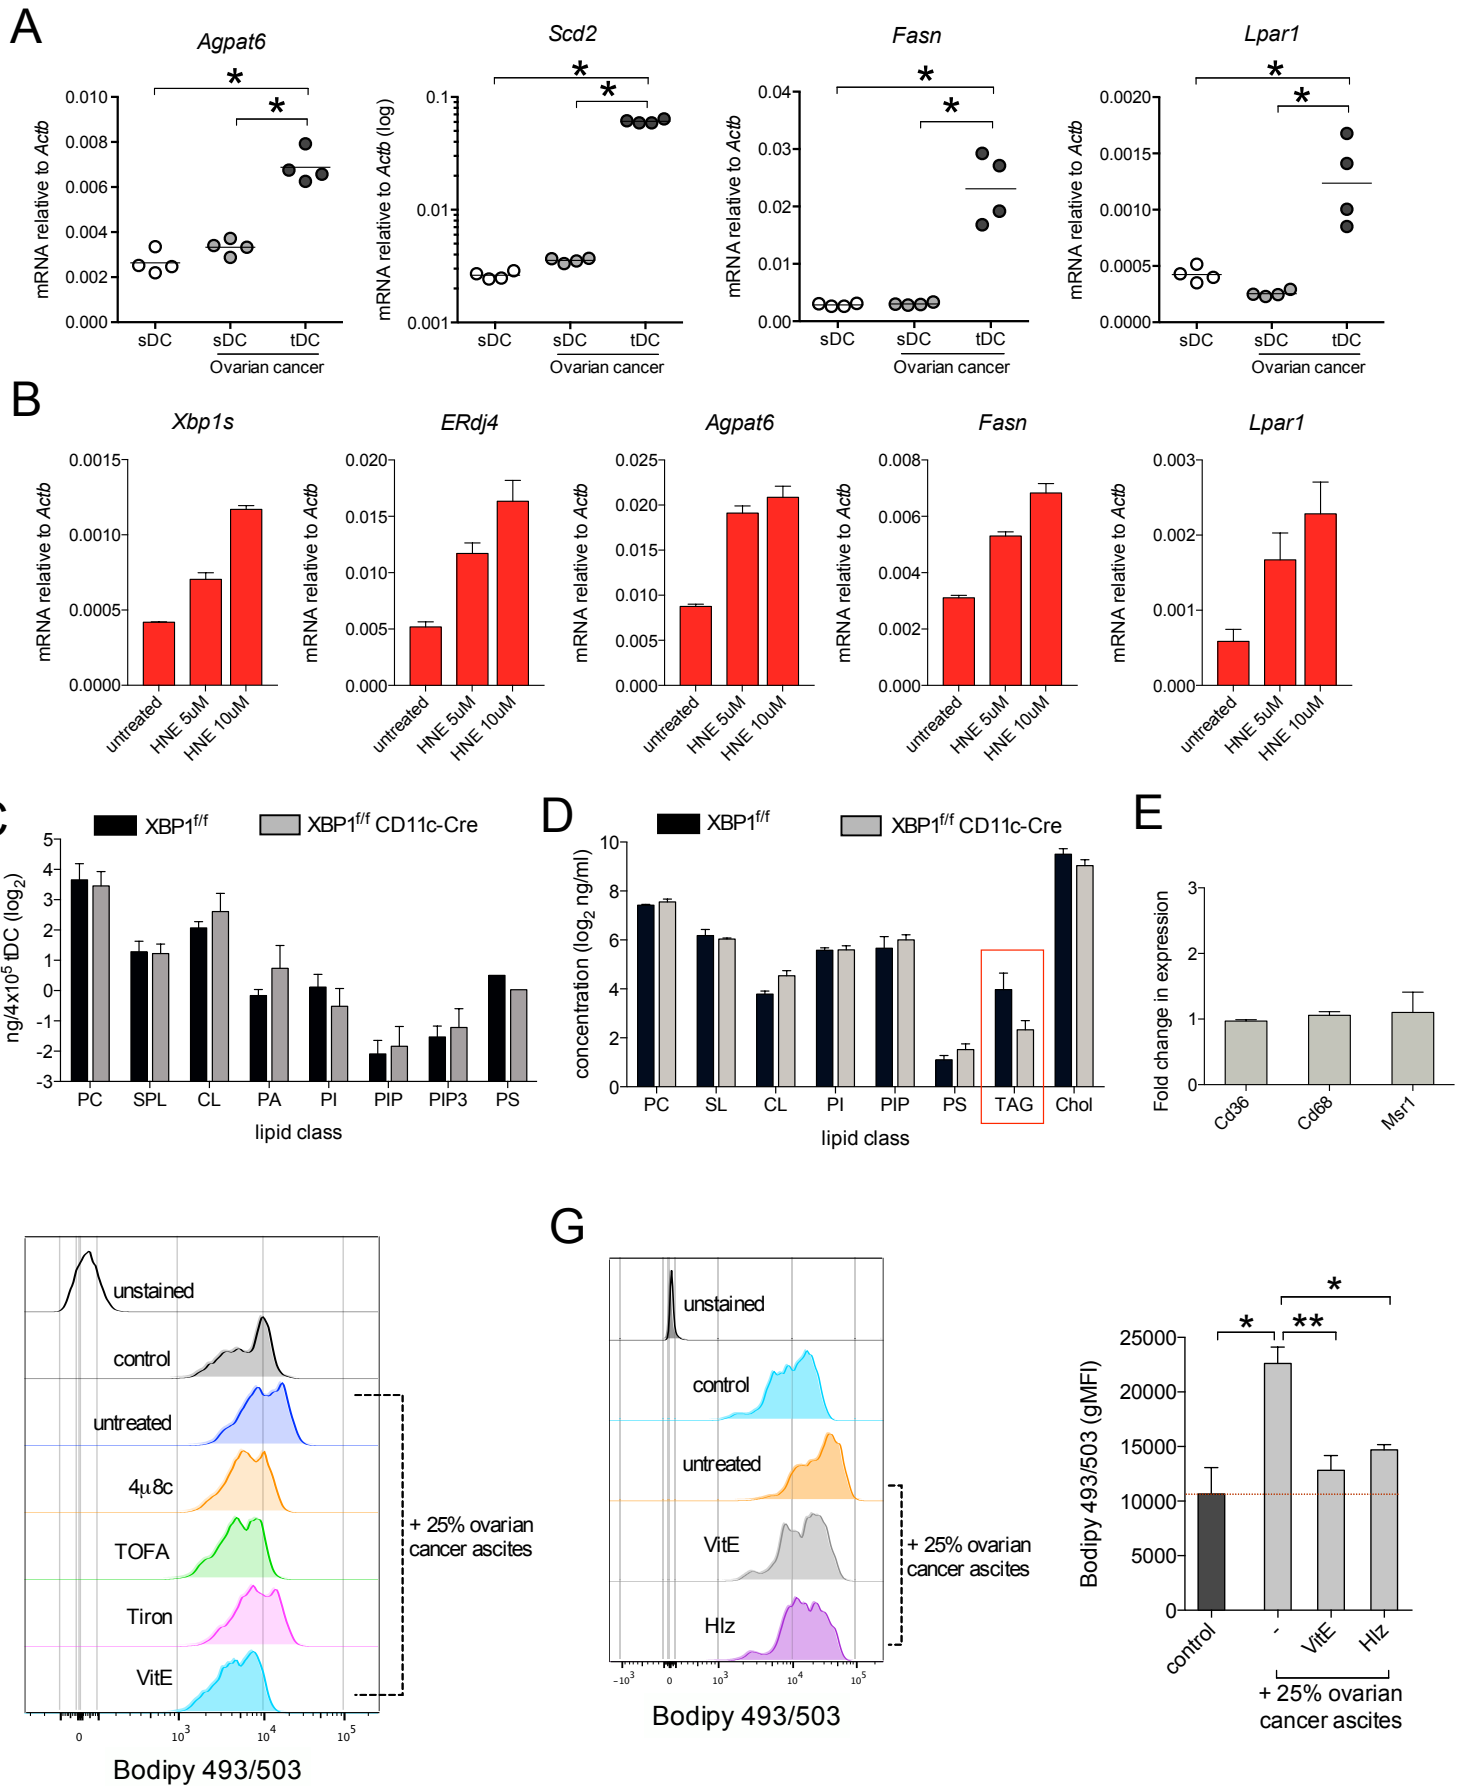

Supplement: NIHMS691029-supplement-9.pdf [file NIHMS691029-supplement-9.pdf]
